# Supplementary material for: Plasmid and Host Strain Characteristics of Escherichia coli Resistant to Extended-Spectrum Cephalosporins in the Norwegian Broiler Production
Source: PubMed Central journal article supplement (PMC4844124; doi:10.1371/journal.pone.0154019), 2016-04-25
Supplement: pone.0154019.s002.pdf [file pone.0154019.s002.pdf]

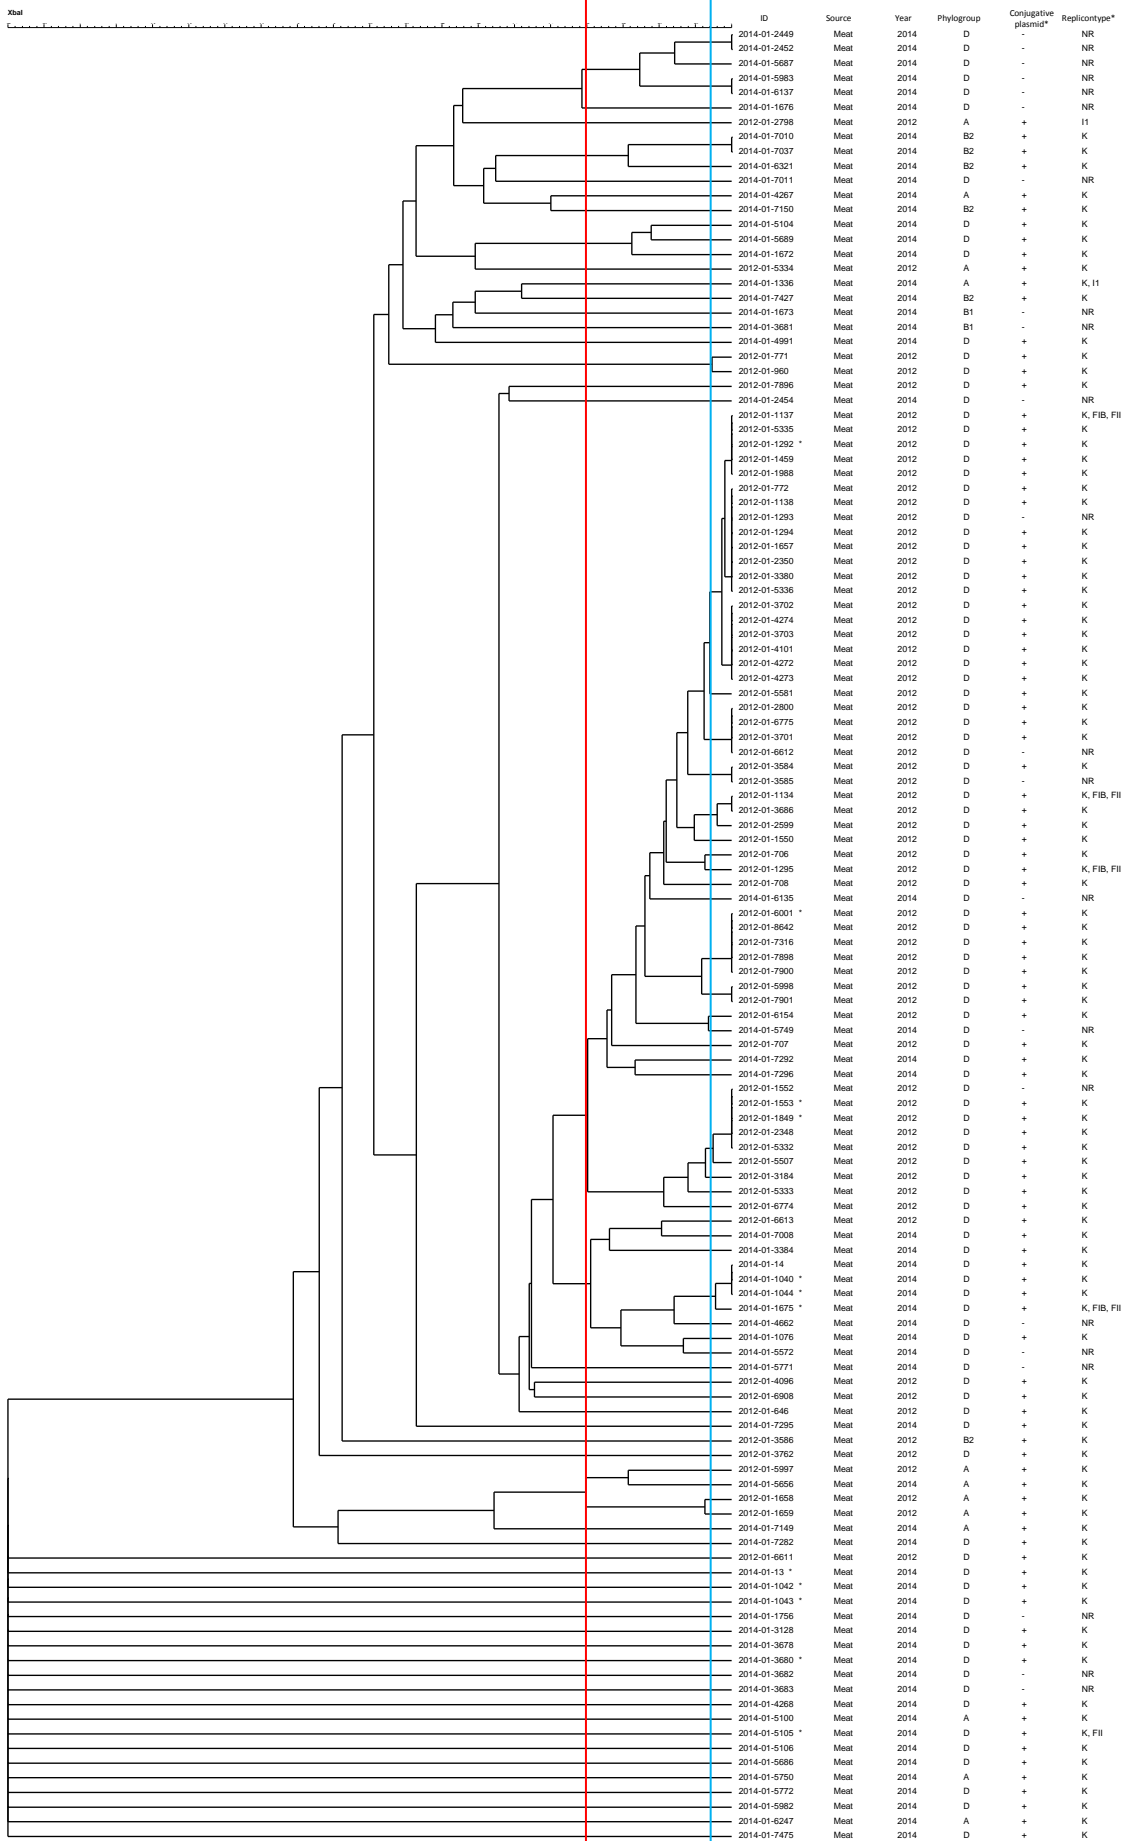\*Transferability of plasmids carrying *bla*<sub>CM2</sub>. Replicon type refers to plasmid replicon (s) in transconjugant. NR: not relevant.
