# Supplementary material for: Plasmid and Host Strain Characteristics of Escherichia coli Resistant to Extended-Spectrum Cephalosporins in the Norwegian Broiler Production
Source: PubMed Central journal article supplement (PMC4844124; doi:10.1371/journal.pone.0154019), 2016-04-25
Supplement: pone.0154019.s005.pdf [file pone.0154019.s005.pdf]

2014-01-1040  
 2014-01-1675  
 2014-01-1044

2014-01-3680  
 2014-01-0013  
 2014-01-1043  
 2014-01-1042  
 2014-01-5105

2011-01-7660  
 2012-01-1553  
 2012-01-1849  
 2011-01-2112  
 2011-01-2112\_ctrl  
 2011-01-5432  
 2012-01-1292  
 2012-01-1292\_ctrl  
 2012-01-6001

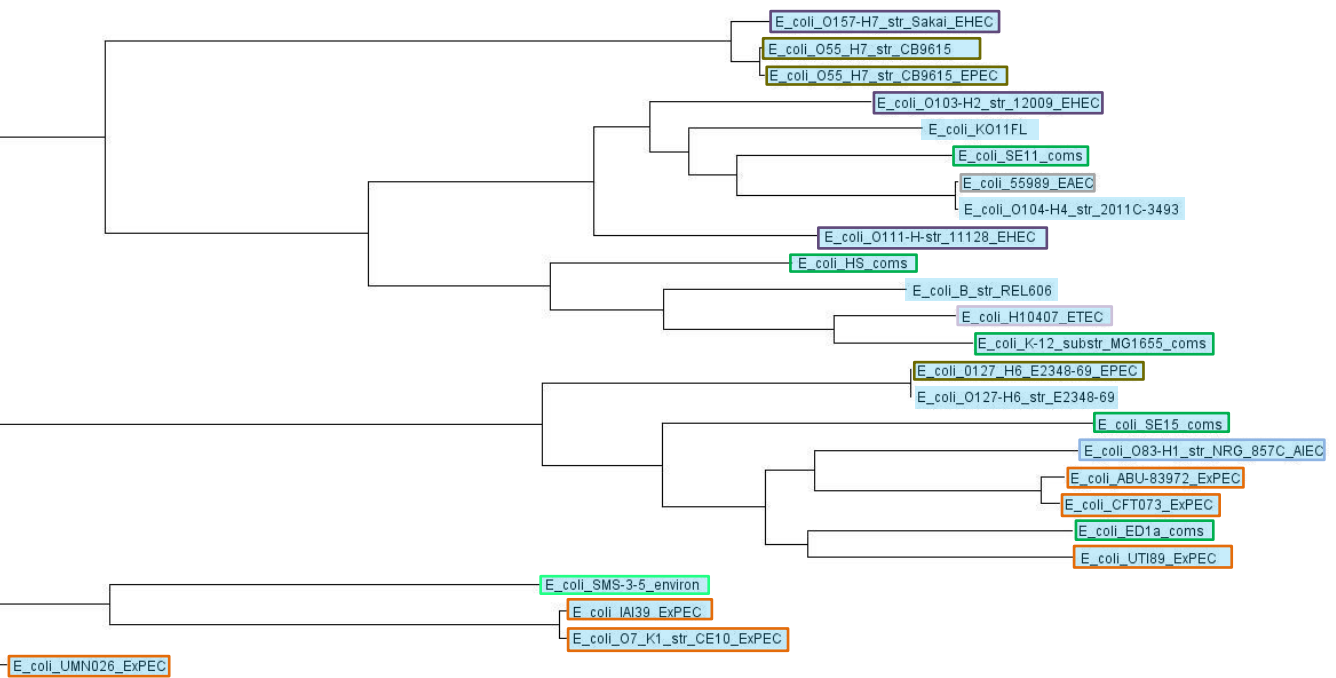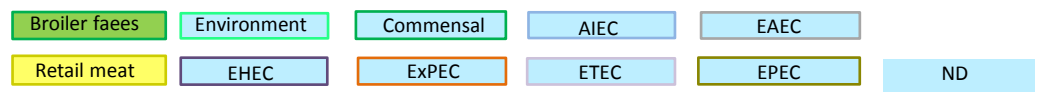

0.05
